# Supplementary material
Source: PubMed Central journal article supplement (PMC5912916)
Supplement: NIHMS954147-supplement-Table_1.pdf [file NIHMS954147-supplement-Table_1.pdf]

**Supplementary Table 1. IC50 (nM) values of 104 inhibitors in ESCC cells**

| RANKING | INHIBITOR           | TARGET                                            | TE7   | TE5   | KYSE30 | KYSE180 |
|---------|---------------------|---------------------------------------------------|-------|-------|--------|---------|
| 1       | Elesclomol          | HSP70                                             | 8     | 10    | 9      | 7       |
| 2       | Flavopiridol        | CDKS                                              | 7     | 6     | 399    | 1001    |
| 3       | Velcade             | Proteasome                                        | 7     | 7     | 196    | 693     |
| 4       | BEZ235              | PI3K/mTOR                                         | 99    | 33    | 7      | 514     |
| 5       | YM-155              | Survivin                                          | 45    | 547   | 8      | 42      |
| 6       | Crenolanib          | PDGFR                                             | 7     | 8     | 4787   | 9334    |
| 7       | Dasatinib           | Src/ Abl/kit                                      | 310   | 326   | 800    | 1000    |
| 8       | MK-2206             | AKT                                               | 9     | 8     | 10000  | 10000   |
| 9       | Ponatinib           | Abl, PDGFR $\alpha$ ,<br>VEGFR2, FGFR1<br>and Src | 24    | 115   | 153    | 129     |
| 10      | SNS-032             | CDKS                                              | 1623  | 1623  | 310    | 408     |
| 11      | Sunitinib           | VEGFR/PDGFR                                       | 520   | 918   | 1000   | 1000    |
| 12      | Vismodegib          | Hedgehog                                          | 7     | 6     | 10000  | 10000   |
| 13      | BI-2536             | PLK1                                              | 1821  | 1906  | 693    | 3163    |
| 14      | 17-AAG              | HSP90                                             | 1515  | 5496  | 2090   | 1446    |
| 15      | A-674563            | AKT                                               | 3632  | 3891  | 709    | 1073    |
| 16      | AT7519              | CDKS                                              | 2400  | 3021  | 183    | 538     |
| 17      | Foretinib           | HGFR/VEGFR                                        | 3389  | 8914  | 1550   | 1906    |
| 18      | H-89                | PKA                                               | 693   | 205   | 10000  | 10000   |
| 19      | MGCD-265            | VEGFR                                             | 340   | 662   | 10000  | 10000   |
| 20      | Midostaurin         | PKC $\alpha$ /VEGFR                               | 18    | 92    | 5013   | 3312    |
| 21      | PD173955            | Bcr-Abl / Src                                     | 1863  | 5496  | 1231   | 2952    |
| 22      | PI-103              | PI3K                                              | 3891  | 7944  | 408    | 1260    |
| 23      | Roscovitine         | CDKS                                              | 1821  | 1414  | 10000  | 10000   |
| 24      | ABT-737             | Bcl family                                        | 10000 | 10000 | 10000  | 10000   |
| 25      | Afatinib            | EGFR/HER2                                         | 3803  | 6027  | 2240   | 2693    |
| 26      | Alisertib           | Aurora A                                          | 10000 | 10000 | 4075   | 10000   |
| 27      | Arsenic<br>Trioxide | N/A                                               | 10000 | 10000 | 10000  | 10000   |
| 28      | Axitinib            | VEGFR, c-kit,<br>PDGFR                            | 10000 | 10000 | 10000  | 10000   |
| 29      | Azacytidine         | DNA<br>methyltransferase                          | 10000 | 10000 | 10000  | 10000   |
| 30      | AZD1480             | JAK1/2                                            | 10000 | 10000 | 10000  | 10000   |
| 31      | Barasertib          | Aurora B                                          | 10000 | 10000 | 10000  | 10000   |
| 32      | BMS-345541          | IKK                                               | 10000 | 10000 | 7245   | 6762    |
| 33      | Bosutinib           | Src/Abl                                           | 3716  | 6762  | 4787   | 3632    |
| 34      | Canertinib          | pan-ErbB                                          | 8914  | 5624  | 10000  | 2819    |
| 35      | Carbozantinib       | c-MET and VEGFR2                                  | 10000 | 10000 | 10000  | 10000   |

|    |                                        |                                       |       |       |       |       |
|----|----------------------------------------|---------------------------------------|-------|-------|-------|-------|
| 36 | Cediranib                              | VEGFR/ c-kit                          | 10000 | 8914  | 4572  | 8512  |
| 37 | CHIR-99021                             | GSK-3 $\alpha/\beta$                  | 3632  | 6027  | 10000 | 10000 |
| 38 | CI-1040                                | MEK                                   | 10000 | 10000 | 10000 | 10000 |
| 39 | CPI-267203                             | BET domain                            | 10000 | 10000 | 10000 | 10000 |
| 40 | Crizotinib                             | c-Met/ALK                             | 3632  | 6027  | 7944  | 10000 |
| 41 | CYT387<br>(momelotinib)                | JAK1/2 inhibitor                      | 6608  | 10000 | 8129  | 10000 |
| 42 | DBZ                                    | Notch $\gamma$ -secretase             | 10000 | 10000 | 10000 | 10000 |
| 43 | Doramapimod                            | p38 MAPK                              | 10000 | 10000 | 10000 | 10000 |
| 44 | Dovitinib                              | FGFR                                  | 4075  | 4468  | 7763  | 10000 |
| 45 | Erlotinib                              | EGFR                                  | 9334  | 10000 | 10000 | 9121  |
| 46 | GDC-0879                               | B-Raf                                 | 10000 | 10000 | 10000 | 10000 |
| 47 | GDC-0941                               | PI3K                                  | 4075  | 4468  | 3632  | 2952  |
| 48 | Gefitinib                              | EGFR                                  | 10000 | 10000 | 10000 | 10000 |
| 49 | GS-1101                                | PI3K delta                            | 5249  | 9551  | 10000 | 10000 |
| 50 | GSK-1838705A                           | IGF-IR                                | 10000 | 10000 | 2952  | 4787  |
| 51 | GSK-1904529A                           | IGF-IR                                | 2189  | 3163  | 10000 | 10000 |
| 52 | GSK690693                              | Akt                                   | 10000 | 10000 | 7763  | 10000 |
| 53 | GW-2580                                | CSF1R/Fms                             | 10000 | 10000 | 10000 | 10000 |
| 54 | Ibrutinib                              | BTK                                   | 10000 | 10000 | 10000 | 2513  |
| 55 | Imatinib                               | v-Abl/PDGFR                           | 10000 | 10000 | 10000 | 10000 |
| 56 | JAK Inhibitor I                        | JAK                                   | 5496  | 9551  | 10000 | 10000 |
| 57 | JNJ-28312141                           | CSF-1R                                | 10000 | 10000 | 10000 | 10000 |
| 58 | JNJ-38877605                           | c-Met                                 | 10000 | 10000 | 10000 | 10000 |
| 59 | JNJ-7706621                            | CDK1/2                                | 10000 | 10000 | 1661  | 6919  |
| 60 | KI20227                                | c-fms                                 | 10000 | 10000 | 10000 | 10000 |
| 61 | KU-55933                               | ATM                                   | 10000 | 10000 | 10000 | 10000 |
| 62 | KW-2449                                | FLT3/ABL/ABL-T315I                    | 10000 | 10000 | 9334  | 10000 |
| 63 | Lapatinib                              | EGFR/HER2                             | 10000 | 9121  | 10000 | 10000 |
| 64 | Linifanib                              | VEGFR/PDGFR                           | 10000 | 10000 | 10000 | 7944  |
| 65 | LY-333531                              | PKC                                   | 10000 | 10000 | 10000 | 10000 |
| 66 | Masitinib                              | Kit/PDGFR $\alpha/\beta$              | 10000 | 10000 | 10000 | 10000 |
| 67 | MLN120B                                | I $\kappa$ B Kinase $\beta$           | 5000  | 5000  | 5000  | 5000  |
| 68 | MLN8054                                | Aurora A                              | 10000 | 10000 | 10000 | 10000 |
| 69 | Motesanib                              | VEGFR                                 | 10000 | 10000 | 10000 | 10000 |
| 70 | Neratinib                              | HER2 and EGFR                         | 3891  | 4787  | 5013  | 2400  |
| 71 | NF- $\kappa$ B Activation<br>Inhibitor | NF- $\kappa$ B                        | 576   | 10000 | 10000 | 10000 |
| 72 | Nilotinib                              | Bcr-Abl                               | 6027  | 7     | 10000 | 10000 |
| 73 | NVP-ADW742                             | IGF-1R                                | 10000 | 10000 | 2952  | 10000 |
| 74 | NVP-TAE684                             | ALK                                   | 8512  | 7414  | 1951  | 10000 |
| 75 | Pazopanib                              | VEGFR/PDGFR, FGFR,<br>c-Kit and c-Fms | 10000 | 10000 | 10000 | 10000 |

|     |             |                                         |       |       |       |       |
|-----|-------------|-----------------------------------------|-------|-------|-------|-------|
| 76  | Pelitinib   | EGFR                                    | 2189  | 3389  | 4170  | 2043  |
| 77  | PHA-665752  | Met                                     | 3632  | 2513  | 9334  | 3549  |
| 78  | PHT-427     | Akt/PDPK1                               | 10000 | 10000 | 10000 | 10000 |
| 79  | PP242       | mTOR                                    | 4366  | 3312  | 852   | 3891  |
| 80  | PRT062607   | SYK                                     | 10000 | 7587  | 9551  | 10000 |
| 81  | Quizartinib | FLT3                                    | 10000 | 10000 | 4075  | 8711  |
| 82  | RAF265      | B-Raf /VEGFR2                           | 10000 | 8711  | 10000 | 2631  |
| 83  | Rapamycin   | mTOR                                    | 10000 | 10000 | 36    | 10000 |
| 84  | Regorafenib | VEGFR/PDGFR $\beta$ /Kit/<br>RET/ Raf-1 | 10000 | 10000 | 10000 | 10000 |
| 85  | Ruxolitinib | JAK1/2                                  | 10000 | 10000 | 10000 | 10000 |
| 86  | S31-201     | Stat3                                   | 10000 | 10000 | 10000 | 10000 |
| 87  | Saracatinib | c-Src/Abl                               | 6027  | 6167  | 3163  | 9334  |
| 88  | SB-431542   | ALK                                     | 10000 | 5249  | 10000 | 10000 |
| 89  | Selumetinib | MEK1                                    | 10000 | 10000 | 10000 | 10000 |
| 90  | SGX-523     | Met                                     | 10000 | 10000 | 8914  | 10000 |
| 91  | Sorafenib   | Raf/VEGFR/PDGFR                         | 4787  | 6762  | 10000 | 10000 |
| 92  | STO609      | CaM-KK                                  | 10000 | 10000 | 10000 | 10000 |
| 93  | SU11274     | c-Met                                   | 10000 | 10000 | 10000 | 10000 |
| 94  | TG100-115   | PI3K                                    | 10000 | 10000 | 10000 | 10000 |
| 95  | Tivozanib   | VEGFR                                   | 10000 | 10000 | 4572  | 10000 |
| 96  | Tofacitinib | JAK1/2                                  | 10000 | 9121  | 10000 | 10000 |
| 97  | Tozasertib  | Aurora/FLT3/ Bcr-Abl                    | 10000 | 10000 | 10000 | 10000 |
| 98  | Trametinib  | MEK1/2                                  | 3312  | 10000 | 760   | 10000 |
| 99  | Vandetanib  | VEGFR2                                  | 5496  | 5249  | 10000 | 2400  |
| 100 | Vargatef    | VEGFR, FGFR,<br>PDGFR                   | 10000 | 10000 | 5013  | 9334  |
| 101 | Vatalanib   | VEGFR2/KDR                              | 10000 | 10000 | 10000 | 10000 |
| 102 | Vemurafenib | BRAF                                    | 10000 | 10000 | 10000 | 10000 |
| 103 | VX-745      | p38 $\alpha$ / $\beta$                  | 10000 | 10000 | 10000 | 10000 |
| 104 | XAV-939     | TNKS1/2                                 | 10000 | 10000 | 10000 | 10000 |
